# Supplementary material for: Vulnerability in elderly patients with gastrointestinal cancer – translation, cultural adaptation and validation of the European Portuguese version of the Vulnerable Elders Survey (VES-13)
Source: BMC Cancer. 2015 Oct 16;15:723. doi: 10.1186/s12885-015-1739-2 (PMC4609118; doi:10.1186/s12885-015-1739-2)
Supplement: Additional file 1: — European Portuguese version of the Vulnerable Elders Survey (VES-13). (PDF 207 kb) [file 12885_2015_1739_MOESM1_ESM.pdf]

## VES-13

### 1. Idade \_\_\_\_\_

Pontuação: 1 ponto para idades entre 75-84 anos  
3 pontos para idades  $\geq 85$  anos

### 2. Em geral, comparando com outras pessoas da mesma idade, diria que a sua saúde é:

☐ Má

☐ Razoável

☐ Boa

☐ Muito boa

☐ Excelente

Pontuação: 1 ponto para má ou razoável

### 3. Que dificuldade tem, em média, com as seguintes actividades físicas:

|                                                                                                                                | Nenhuma<br>dificuldade   | Pouca<br>dificuldade     | Alguma<br>dificuldade    | Muita<br>dificuldade       | Incapaz<br>de fazer        |
|--------------------------------------------------------------------------------------------------------------------------------|--------------------------|--------------------------|--------------------------|----------------------------|----------------------------|
| a. Abaixar-se, agachar-se ou ajoelhar-se? .....                                                                                | <input type="checkbox"/> | <input type="checkbox"/> | <input type="checkbox"/> | <input type="checkbox"/> * | <input type="checkbox"/> * |
| b. Levantar ou carregar objectos com peso de cerca de 5 kg?.....                                                               | <input type="checkbox"/> | <input type="checkbox"/> | <input type="checkbox"/> | <input type="checkbox"/> * | <input type="checkbox"/> * |
| c. Levantar os braços ou chegar a objectos acima do nível do ombro?                                                            | <input type="checkbox"/> | <input type="checkbox"/> | <input type="checkbox"/> | <input type="checkbox"/> * | <input type="checkbox"/> * |
| d. Escrever, agarrar ou manusear pequenos objectos? .....                                                                      | <input type="checkbox"/> | <input type="checkbox"/> | <input type="checkbox"/> | <input type="checkbox"/> * | <input type="checkbox"/> * |
| e. Andar 400 metros? .....                                                                                                     | <input type="checkbox"/> | <input type="checkbox"/> | <input type="checkbox"/> | <input type="checkbox"/> * | <input type="checkbox"/> * |
| f. Realizar tarefas domésticas pesadas? (pense em tarefas do género de esfregar o chão, lavar janelas ou carregar lenha) ..... | <input type="checkbox"/> | <input type="checkbox"/> | <input type="checkbox"/> | <input type="checkbox"/> * | <input type="checkbox"/> * |

Pontuação: 1 ponto para cada resposta, de 3a. a 3f. com \*  
No máximo de 2 pontos

#### 4. Por causa da sua saúde ou condição física, tem alguma dificuldade em:

a. Fazer compras de objectos para uso pessoal? (como higiene pessoal ou medicamentos)

|                                                                        |        |                                       |                                     |
|------------------------------------------------------------------------|--------|---------------------------------------|-------------------------------------|
| <input type="checkbox"/> <b>SIM</b> → Precisa de ajuda com as compras? | —————→ | <input type="checkbox"/> <b>SIM</b> * | <input type="checkbox"/> <b>NÃO</b> |
| <input type="checkbox"/> <b>NÃO</b>                                    |        |                                       |                                     |
| <input type="checkbox"/> <b>NÃO O FAÇO</b> → Por motivos de saúde?     | —————→ | <input type="checkbox"/> <b>SIM</b> * | <input type="checkbox"/> <b>NÃO</b> |

b. Lidar com dinheiro? (como manter o controlo das despesas ou o pagamento das contas)

|                                                                                       |        |                                       |                                     |
|---------------------------------------------------------------------------------------|--------|---------------------------------------|-------------------------------------|
| <input type="checkbox"/> <b>SIM</b> → Precisa de ajuda para lidar com o seu dinheiro? | —————→ | <input type="checkbox"/> <b>SIM</b> * | <input type="checkbox"/> <b>NÃO</b> |
| <input type="checkbox"/> <b>NÃO</b>                                                   |        |                                       |                                     |
| <input type="checkbox"/> <b>NÃO O FAÇO</b> → Por motivos de saúde?                    | —————→ | <input type="checkbox"/> <b>SIM</b> * | <input type="checkbox"/> <b>NÃO</b> |

c. Caminhar dentro de casa? (PODE USAR BENGALA OU ANDARILHO)

|                                                                                                               |        |                                       |                                     |
|---------------------------------------------------------------------------------------------------------------|--------|---------------------------------------|-------------------------------------|
| <input type="checkbox"/> <b>SIM</b> → Precisa de outra ajuda para caminhar?<br>(além da bengala ou andarilho) | —————→ | <input type="checkbox"/> <b>SIM</b> * | <input type="checkbox"/> <b>NÃO</b> |
| <input type="checkbox"/> <b>NÃO</b>                                                                           |        |                                       |                                     |
| <input type="checkbox"/> <b>NÃO O FAÇO</b> → Por motivos de saúde?                                            | —————→ | <input type="checkbox"/> <b>SIM</b> * | <input type="checkbox"/> <b>NÃO</b> |

d. Fazer tarefas domésticas leves? (pense em tarefas como lavar a louça, arrumar ou fazer a cama)

|                                                                                         |        |                                       |                                     |
|-----------------------------------------------------------------------------------------|--------|---------------------------------------|-------------------------------------|
| <input type="checkbox"/> <b>SIM</b> → Precisa de ajuda com as tarefas domésticas leves? | —————→ | <input type="checkbox"/> <b>SIM</b> * | <input type="checkbox"/> <b>NÃO</b> |
| <input type="checkbox"/> <b>NÃO</b>                                                     |        |                                       |                                     |
| <input type="checkbox"/> <b>NÃO O FAÇO</b> → Por motivos de saúde?                      | —————→ | <input type="checkbox"/> <b>SIM</b> * | <input type="checkbox"/> <b>NÃO</b> |

e. Tomar banho?

|                                                                          |        |                                       |                                     |
|--------------------------------------------------------------------------|--------|---------------------------------------|-------------------------------------|
| <input type="checkbox"/> <b>SIM</b> → Precisa de ajuda para tomar banho? | —————→ | <input type="checkbox"/> <b>SIM</b> * | <input type="checkbox"/> <b>NÃO</b> |
| <input type="checkbox"/> <b>NÃO</b>                                      |        |                                       |                                     |
| <input type="checkbox"/> <b>NÃO O FAÇO</b> → Por motivos de saúde?       | —————→ | <input type="checkbox"/> <b>SIM</b> * | <input type="checkbox"/> <b>NÃO</b> |

Pontuação: 4 pontos por um ou mais \* nas perguntas 4a. a 4e.
